# Supplementary material for: Effectiveness of Oral Health Education Intervention among 12-15-Year-Old School Children in Dharan, Nepal: A Randomized Controlled Trial
Source: Research Square preprint supplement (doi:10.21203/rs.3.rs-56726/v2), 2021-01-11
Supplement: Supplementary file 1 [file 3d75543d313fa6c0a72f2b5c.docx]

**QUESTIONNAIRE IN ENGLISH**

Serial No. Assessment at: Baseline / 3rd months / 6th months

School Name: Group:

Name of the child: Age:

Gender: Female / Male Grade:

For socioeconomic status:

A. Family income per month in Nepali rupees:

(1) <2,300 (2) 2,301-6,850 (3) 6,851-11,450

(4) 11,451-17150 (5) 17,151-22,850 (6) ≥45,751

B. Parent's education level:

(1) Illiterate (2) Primary school level (3) Middle school level

(4) High school level (5) Intermediate/post high school

(6) Graduate/post graduate (7) Profession/Honors

C. Parent's occupation:

(1) Unemployed (2) Unskilled worker (3) Semi-skilled worker

(4) Skilled worker (5) Clerical, shop (6) Semi-profession (7) Profession

**Questionnaire regarding Oral health knowledge**

1. Is oral health a part of general health?
2. Yes B) No
3. How many milk teeth do we have?
4. 10 C) 28
5. 20 D)32
6. How many permanent teeth do we have?

A)10 C) 28

B)20 D) 32

1. How often should we brush our teeth?

A) Once a day in the morning B) Once a day in the evening

C) After each meal D) When we remember

E) I don’t know

1. Dental floss is used to clean:

A) The lip B) The areas between the teeth

C) The chewing surfaces of the teeth D) I don’t know

1. When should we visit the dentist?

A) Whenever we hurt or have a problem B) At least once a year for check-up

C) When entering primary school D) When entering high school

1. What is the cause of caries?

A) Dirty hands B) Frequent consumption of sweets and soda C) Frequent tooth brushing D) The meat

1. Dental plaque is:

A) Membrane of bacteria on teeth B) Caries C) Red mass on gum D) I don’t know

1. What is the first sign of gingivitis?

A) Oral ulcers B) White gums

C) Swollen gums that bleed D) I don’t know

1. When is it better to eat a sweet?

A) After meal B) Between meals

C) Before going to bed D) I don’t know

11. what is fluoride?

A) A substance that purifies water

B) A substance that improves taste of food

C) A chemical substance in water that prevent dental caries

D) I don’t know

**Questionnaire regarding Oral Health Behavior/ practices:**

12. How do you clean your teeth?

A) Toothbrush and toothpaste/toothpowder

B) Finger and toothpaste/toothpowder

C)Toothbrush only D) Finger only E) Any other

1. How often do you brush your teeth daily?

A) Once a day in the morning B) Once a day in the evening

C)Twice daily after each main meal D) more than twice daily

E) Not every day

1. What type of toothbrush bristle do you use?
2. Ultra-Soft B) Soft
3. Medium D) Hard
4. How often do you change your toothbrush?
5. Every month B) Every 2 months
6. Every 3-4 months D) Every 6 months
7. Every year F) When bristles flare out
8. Did you clean your teeth last time after eating sweets or chocolates?
9. Yes B) No
10. Do you clean your tongue?
11. Yes B) No
12. Do you use dental floss?

A) Yes B) No

1. Did you visit the dentist in the last 12 months?

A) No I didn’t B) Once

C) Many times D) I don’t know/ remember

**Questionnaire regarding Oral Health Attitudes:**

1. If your teeth are dirty:

A) You don’t care B) It bothers you a little C) It bothers you a lot

1. Do you think that improving and maintaining health of the mouth is in your control?

A) Yes B) No

1. Brushing teeth can prevent teeth decay and gum disease

A) Strongly agree B) Agree

C) Uncertain D) Disagree E) strongly disagree

1. Do you think it is required to visit a dentist periodically to maintain health of your mouth?

A) Yes B) No

**Turesky – Gilmore - Glickman modification of the Quigley-Hein plaque index (1970)**

**17 16 15 14 13 12 11 21 22 23 24 25 26 27**

|  |  |  |  |  |  |  |  |  |  |  |  |  |  |
| --- | --- | --- | --- | --- | --- | --- | --- | --- | --- | --- | --- | --- | --- |
|  |  |  |  |  |  |  |  |  |  |  |  |  |  |

|  |  |  |  |  |  |  |  |  |  |  |  |  |  |
| --- | --- | --- | --- | --- | --- | --- | --- | --- | --- | --- | --- | --- | --- |
|  |  |  |  |  |  |  |  |  |  |  |  |  |  |

**47 46 45 44 43 42 41 31 32 33 34 35 36 37**

**Score:**

| **Score** | **Interpretation** |
| --- | --- |
| **0** | **No plaque** |
| **1** | **Isolated flecks of plaque at the gingival margin** |
| **2** | **A continuous band of plaque up to 1mm at the gingival margin** |
| **3** | **Plaque greater than 1mm in width and covering up to one third of the tooth surface** |
| **4** | **Plaque covering from one thirds to two thirds of the tooth surface** |
| **5** | **Plaque covering more than two thirds of the tooth surface** |

**Gingival index ( Loe H and Silness J, 1963)**

|  |  |  |  |  |  |  |  |  |  |  |  |  |  |  |  |  |  |  |  |  |  |  |  |  |  |  |  |  |  |  |  |  |  |  |  |  |  |  |  |  |  |
| --- | --- | --- | --- | --- | --- | --- | --- | --- | --- | --- | --- | --- | --- | --- | --- | --- | --- | --- | --- | --- | --- | --- | --- | --- | --- | --- | --- | --- | --- | --- | --- | --- | --- | --- | --- | --- | --- | --- | --- | --- | --- |
|  | | |  | | |  | | |  | | |  | | |  | | |  | | |  | | |  | | |  | | |  | | |  | | |  | | |  | | |

**17 16 15 14 13 12 11 21 22 23 24 25 26 27**

B

P

|  |  |  |  |  |  |  |  |  |  |  |  |  |  |  |  |  |  |  |  |  |  |  |  |  |  |  |  |  |  |  |  |  |  |  |  |  |  |  |  |  |  |
| --- | --- | --- | --- | --- | --- | --- | --- | --- | --- | --- | --- | --- | --- | --- | --- | --- | --- | --- | --- | --- | --- | --- | --- | --- | --- | --- | --- | --- | --- | --- | --- | --- | --- | --- | --- | --- | --- | --- | --- | --- | --- |
|  | | |  | | |  | | |  | | |  | | |  | | |  | | |  | | |  | | |  | | |  | | |  | | |  | | |  | | |

B

L

**47 46 45 44 43 42 41 31 32 33 34 35 36 37**

**Score:**

| **Score** |  |
| --- | --- |
| **0** | **Normal gingiva** |
| **1** | **Mild inflammation-slight change in color, slight oedema. No bleeding on probing** |
| **2** | **Moderate inflammation-redness, oedema and glazing. Bleeding on probing** |
| **3** | **Severe inflammation-marked redness and oedema. Ulceration. Tendency to spontaneous bleeding** |

**DENTITION STATUS AND TREATMENT NEEDS (1997)**

| **18 17 16 15 14 13 12 11 21 22 23 24 25 26 27 28** | | | | | | | | | | | | | | | |
| --- | --- | --- | --- | --- | --- | --- | --- | --- | --- | --- | --- | --- | --- | --- | --- |
| Crown  Root  Treatment |  |  |  |  |  |  |  |  |  |  |  |  |  |  |  |
|  |  |  |  |  |  |  |  |  |  |  |  |  |  |  |  |
|  |  |  |  |  |  |  |  |  |  |  |  |  |  |  |  |

| **48 47 46 45 44 43 42 41 31 32 33 34 35 36 37 38**  Crown  Root  Treatment | | | | | | | | | | | | | | | |
| --- | --- | --- | --- | --- | --- | --- | --- | --- | --- | --- | --- | --- | --- | --- | --- |
|  |  |  |  |  |  |  |  |  |  |  |  |  |  |  |  |
|  |  |  |  |  |  |  |  |  |  |  |  |  |  |  |  |
|  |  |  |  |  |  |  |  |  |  |  |  |  |  |  |  |

| **Primary Teeth**  **Crown** | **Permanent Teeth** | | **status** | **Treatment** | |
| --- | --- | --- | --- | --- | --- |
| **Crown** | **Root** |  |
| **A** | **0** | **0** | **Sound** | **0** | **None** |
| **B** | **1** | **1** | **Decayed** | **P** | **preventive, caries arresting care** |
| **C** | **2** | **2** | **Filled with decayed** | **F** | **Fissure sealant** |
| **D** | **3** | **3** | **Filled, no decay** | **1** | **one surface filling** |
| **E** | **4** | **-** | **Missing as a result of caries** | **2** | **Two or more surface fillings** |
| **-** | **5** | **-** | **Missing, any other reason** | **3** | **Crown for any reasons** |
| **F** | **6** | **-** | **Fissure sealant** | **4** | **Veneer or laminates** |
| **G** | **7** | **7** | **Bridge abutment,special crown or Venner/Implant** | **5** | **Pulp care and restortaion** |
| **6** | **Extraction** |
| **-** | **8** | **8** | **Unerupted tooth, (Crown)/Unexposed Root** | **7** | **Need for other care (Specify…..)** |
| **T** | **T** | **-** | **Trauma (Fracture)** | **8** | **Need for other care (Specify…..)** |
| **-** | **9** | **9** | **Not recorded** | **9** | **Not recorded** |

**QUESTIONNAIRE IN LOCAL LANGUAGE (NEPALI)**

**k|ZgfjnL**

क्रमस gDa/ M ;d'x M laBfno M

gfd M

pd]/÷lnË MsIff M

**cly{s juL{s/0f M**

c= kl/jf/sf] dfl;s cfDbgL -g]kfnL ?k}ofFdf_

!_ <@,#)) @_@,#)!-^,*%) #_ ^,*%! -!!,$%) $_ !!,$%! -!&,!%)

%_ !&,!%! -@@,*%) ^_≥ ≥$%,&%!

cf= cleefassf] z}lIfs of]Uotf

!= clzlIft @= k|fyflds tx #= lgDGg dfWolds tx $= dfWolds tx

%= pRr\ dfWolds tx ^= :gfts jf :gftsf]Q/ &= Jojf;o jf dfgfy{

O= cleefassf] k];f

!= j]/f]huf/ @= cs'zn sfdbf/ #= cw{ s'zn sfdbf/ $= s'zn sfdbf/ %= sd{rf/L,k;n

^= cw{ Jojf;o &= Jojf;o

**d'v :jf:Yosf] 1fg**

!= s] d'v :jf:Yo ;du| :jf:ysf] Pp6f v08 jf efu xf] <

s_ xf] v_ xf]Og

@= xfdL सँग sltj6f b'w] दाँत x'G5g\ <

s_ !) v_ @) u_ @* 3_ #@

#= xfdL सँग sltj6f :yfoL दाँत x'G5g <

s_ !) v_ @) u_ @* 3_ #@

$= xfdL lbgdf slt k6s दाँत df‰g'k5{ ' <

s_ lbgdf Ps k6s laxfg v_ lbgdf Ps k6s साँझ u_ x/]s vfg. kl5 3_ ;Dem]sf] a]nfdf ª_ yfxf 5}g

%= bGt wfuf] s] ;kmf ug{ k|of]u x'G5 <

s_ cf]7 v_ दाँतको larsf] efu u_ bftx?sf] rkfpg] ;tx ;kmf ug{ 3_ yfxf 5}g

^= bGt lrlsT;snfO{ s'g a]nf e]6\g' cfa:os 5 <

s_ ha b'V5 jf ;d:of x'G5 v_ slDtdf aif{sf] Psk6s

u_ k|fylds lawfno k|a]z ubf{ 3_ pRr lawfno k|a]z ubf{

&= bGt ;8\g jf दाँतमा ls/f nfUg] sf/0f s] xf] <

s_ kmf]x/ xft v_ af/Daf/ u'lnof] jf ;f]8f vfgfn]

u_ w]/} k6s दाँत df‰gfn] 3_ df;'

*= bGt n]p s] xf] <

s_ दाँतको ;tx df x'g] ;'Id ls6f0f'x?sf] lemNnL v_ दाँतको ls/f

u_ luhfdf x'g] /ftf] uf7f] 3_ yfxf 5}g

(= luhfsf] ;qmd0fsf] klxnf] nIf0f s] xf] <

s_ d'vsf] 3fp v_ ;]tf] luhf

u_ luhf ;'GgLP/ /ut aUg' 3_ yfxf 5}g

!)= u'lnof] s'/f slta]nf vfg' pko'Qm x'G5 <

s_ vfgf kl5 v_ vfgfsf] lardf u_ ;'Tg' hfg' cl3 3_ yfxf 5}g

!!= फ्लोराइड s] xf] <

s=_ kflg z'4 kfg]{ tTj v_ vfgfsf] :jfb ;'wfg]{ tTj

u_ kfgLdf kfOg] /f;foLlgs tTj h;n] bGt ;8\g /f]syfd u5{ 3_ yfxf 5}g

**d'v :jf:Yosf] afgL Aoxf]/f jf Jojxf/**

!@= tkfO{ आफ्नो दाँत s;/L ;kmf ug{'x'G5 <

s_ a|; / dGhg jf kfp8/ v_ cf}nf / dGhg jf kfp8/ u_a|;n] dfq

3_ cf}nfn] dfq ª_ c? s'g}===================================

!#= tkfO{ lbgdf sltk6s दाँत df‰g'x'G5 <

s_lbgdf Ps k6s laxfg v_ lbgdf Ps k6s साँझ u_ lbgdf b'Ok6s x/]s vfgf kl5

3_ lbgdf b'Ok6s eGbf a9L ª_ x/]s lbg ulb{g

!$= tkfO{ s:tf] k|sf/sf] a'?; k|of]u ug{'x'G5 <

s_ w]/} g/d v_ g/d u_ dWod 3_ s8f

!%= tkfO{ a'?; slt ;do kl5 km]g{'x'G5 <

s_ k|To]s dlxgf v_ k|To]s @ dlxgf u_ k|To]s ^ dlxgf

3_ k|To]s aif{ ª_ a'?;sf] /];f afFuLodf r_#-$ dlxgfdf

!^= tkfOn] kl5Nnf] k6s ld7fO{ jf rsn]6 vfP kl5 दाँत ;kmf ug{'eof] <

s_ u/] v_ ul/g

!&= s] tkfO{ ] lha|f] ;kmf ug{'x'G5 <

s_ u5{' v_ ulb{g

!*= s] tkfO{ bGt wfuf] k|of]u ug{'x'G5 <

s_ u5{' v_ ulb{g

!(= s] tkfO{n] kl5Nnf] !@ dlxgfdf bGt lrlsT;snfO{ e]6\g'eof] <

s_ gfO{ e]l6g v_ Ps k6s u_ w]/} k6s 3_ yfxf 5}g, ;Demgf 5}g

**d'v :jf:Yosf k|a[lQ**

@)= tkfOsf] दाँत kmf]x/ ePdf s:tf] nfU5 <

s_ jf:tf ulb{g v_ yf]/} lrGtf nfU5 u_ w]/} lrGtf nfU5

@!= s] tkfOnfO{ आफ्नो d'v / दाँतको :jf:Yo ;'wf/ / ;+/If0f ug{ आफ्नो lgoGq0fdf 5 h:tf] nfU5 <

s_ nfU5 v_ nfUb}g

@@= दाँत df‰gfn] bGt ;8\g / luhfsf] /f]unfO{ /f]Sg ;S5 <

s_ k"0f{?kn] ;xdt 5' v_ ;xdt 5' u_ vf]O yfxf ePg 3_c;xdt

ª_ lans'n c;xdt

@#= d'v :jf:YonfO{ ;+/If0f ug{ bGtlrlsT;snfO{ ;do ;dodf e]6\g h?l/ 5 h:tf] nfU5 <

s_ 5 v_ 5}g
